# Supplementary material for: Multitrophic diversity effects of network degradation
Source: PubMed Central journal article supplement (PMC4979718; doi:10.1002/ece3.2253), 2016-06-21

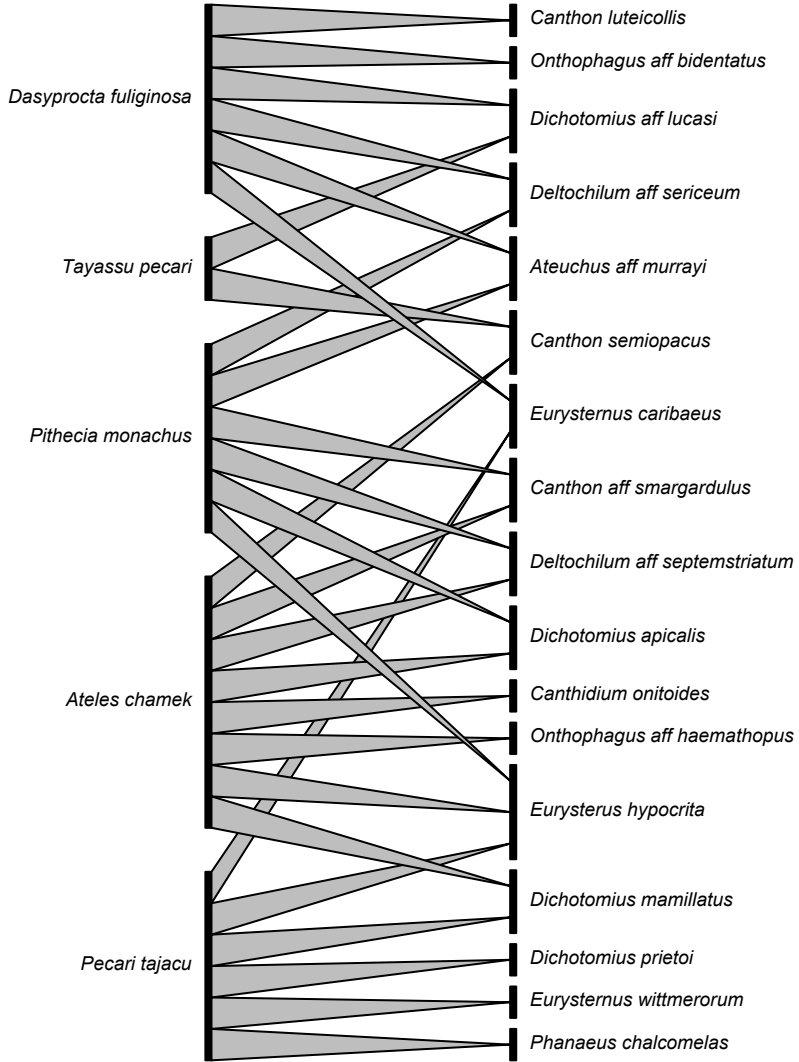

Supplement: ECE3-6-4936-s001.pdf [file ECE3-6-4936-s001.pdf]
